# Supplementary material for: Comparison of Pathogenicity-Related Genes in the Current Pseudorabies Virus Outbreak in China
Source: PubMed Central journal article supplement (PMC5552686; doi:10.1038/s41598-017-08269-3), 2017-08-10
Supplement: 41598_2017_8269_MOESM1_ESM.pdf [file 41598_2017_8269_MOESM1_ESM.pdf]

## Comparison of Pathogenicity-Related Genes in the Current Pseudorabies

### Virus Outbreak in China

Yan-Dong Tang<sup>1</sup>, Ji-Ting Liu<sup>1,2</sup>, Tong-Yun Wang<sup>1</sup>, Ming-Xia Sun<sup>1</sup>, Zhi-Jun Tian<sup>1</sup>,

Xue-Hui Cai<sup>1\*</sup>

**Figure S1 Gene knockouts confirmation.** From (A) to (E), the indicated mutants were confirmed by DNA sequencing. From (F) to (H), the indicated mutants were confirmed by western blot. (I), TK deletion mutant was confirmed by ACV.

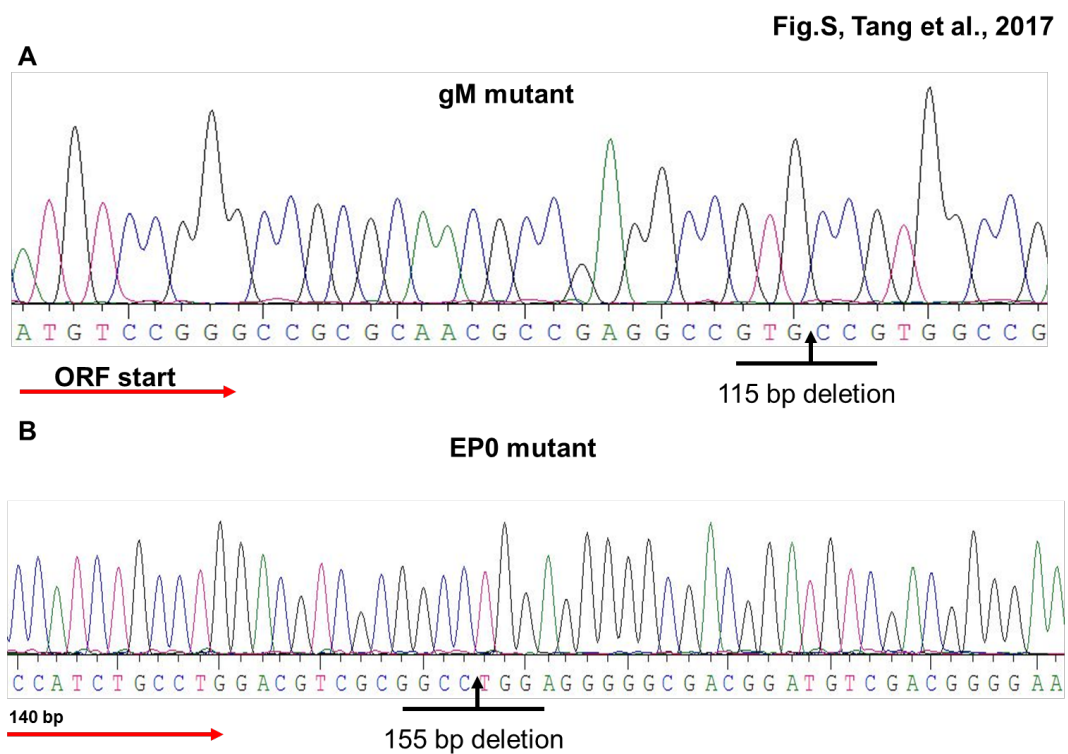

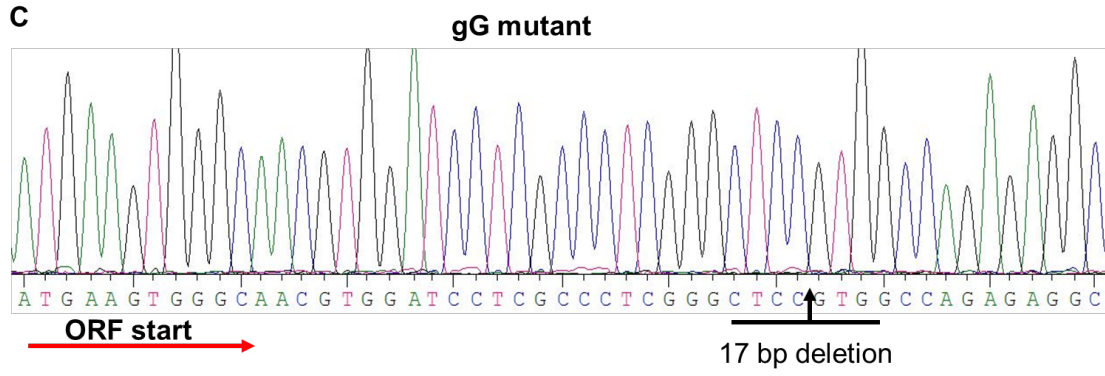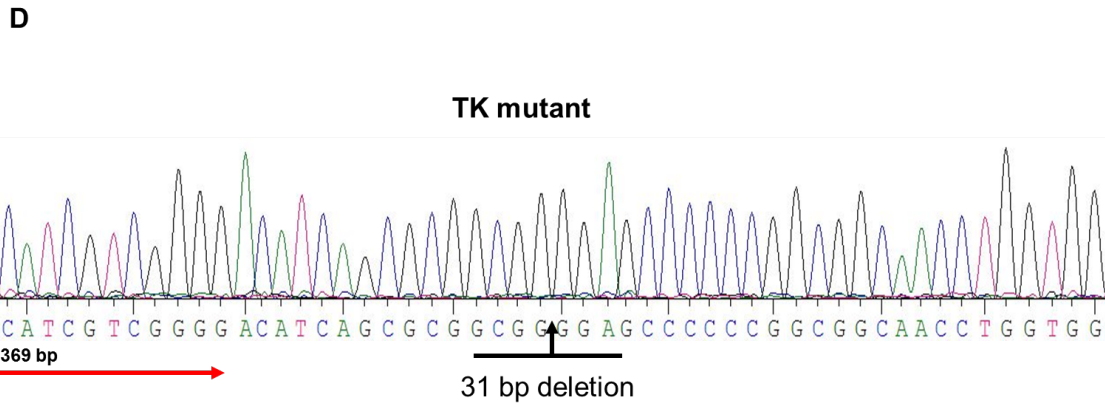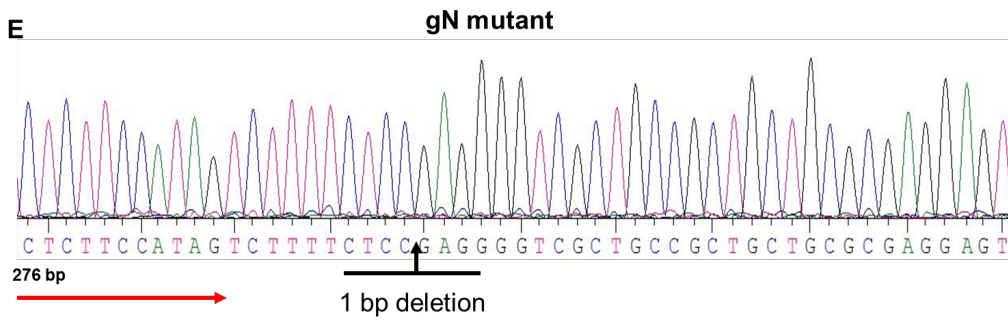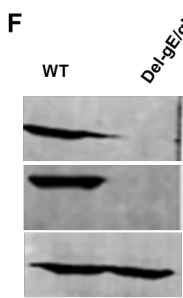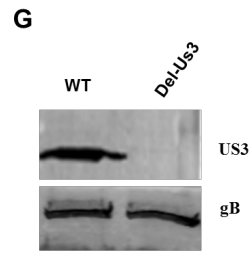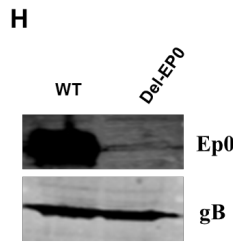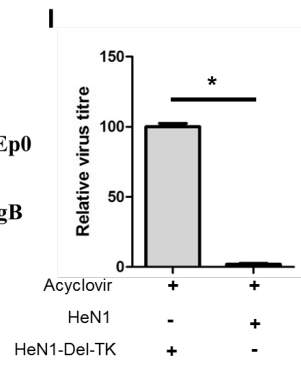

Table S. CRISPR/Cas9 knockout efficiency.

| <b>sgRNAs</b>          | <b>Purified clones</b> | <b>Mutated clones</b> | <b>Mutated ratio</b> |
|------------------------|------------------------|-----------------------|----------------------|
| gRNA-gE                | 32                     | 11                    | 34.4%                |
| gRNA-gI                | 12                     | 2                     | 16.7%                |
| gRNA-U <sub>s</sub> 2  | 7                      | 3                     | 42.9%                |
| gRNA- U <sub>s</sub> 3 | 12                     | 4                     | 33.3%                |
| gRNA- U <sub>s</sub> 9 | 8                      | 2                     | 25%                  |
| gRNA-EP0               | 23                     | 4                     | 17.4%                |
| gRNA-TK                | 24                     | 3                     | 12.5%                |
| gRNA-gG                | 12                     | 4                     | 33.3%                |
| gRNA-gM                | 8                      | 3                     | 37.5%                |
| gRNA-gN                | 11                     | 2                     | 18.2%                |
